# Supplementary material for: Parsing Social Network Survey Data from Hidden Populations Using Stochastic Context-Free Grammars
Source: PubMed Central journal article supplement (PMC2734164; doi:10.1371/journal.pone.0006777), 2009-09-07
Supplement: pone.0006777.s005.pdf [file pone.0006777.s005.pdf]

| LOCATION                | MLE        | Lower 95%        | Upper 95%        | log L        | df        | AIC        |
|-------------------------|------------|------------------|------------------|--------------|-----------|------------|
| <b>2-visible</b>        |            |                  |                  | -239.281     | 9         | 496.562    |
| S->(G)                  | 0.800      | 0.560            | 0.946            |              |           |            |
| S->(H)                  | 0.200      | 0.054            | 0.440            |              |           |            |
| G->A                    | 0.351      | 0.267            | 0.441            |              |           |            |
| G->A (X)                | 0.149      | 0.092            | 0.222            |              |           |            |
| G->A (XX)               | 0.175      | 0.113            | 0.252            |              |           |            |
| G->A (XXX)              | 0.325      | 0.243            | 0.414            |              |           |            |
| X->G                    | 0.958      | 0.921            | 0.982            |              |           |            |
| X->H                    | 0.042      | 0.018            | 0.079            |              |           |            |
| H->B                    | 0.441      | 0.283            | 0.472            |              |           |            |
| H->B (Y)                | 0.176      | 0.074            | 0.326            |              |           |            |
| H->B (YY)               | 0.206      | 0.094            | 0.360            |              |           |            |
| H->B (YYY)              | 0.176      | 0.074            | 0.326            |              |           |            |
| Y->G                    | 0.053      | 0.009            | 0.154            |              |           |            |
| Y->H                    | 0.947      | 0.846            | 0.991            |              |           |            |
| <b>constrain mix</b>    |            |                  |                  | -307.877     | 8         | 631.754    |
| S->(G)                  | 0.800      | 0.560            | 0.946            |              |           |            |
| S->(H)                  | 0.200      | 0.054            | 0.440            |              |           |            |
| G->A                    | 0.351      | 0.267            | 0.441            |              |           |            |
| G->A (X)                | 0.149      | 0.092            | 0.222            |              |           |            |
| G->A (XX)               | 0.175      | 0.113            | 0.252            |              |           |            |
| G->A (XXX)              | 0.325      | 0.243            | 0.414            |              |           |            |
| X->G                    | 0.791      | 0.732            | 0.843            |              |           |            |
| X->H                    | 0.209      | 0.157            | 0.268            |              |           |            |
| H->B                    | 0.441      | 0.283            | 0.608            |              |           |            |
| H->B (Y)                | 0.176      | 0.074            | 0.326            |              |           |            |
| H->B (YY)               | 0.206      | 0.094            | 0.360            |              |           |            |
| H->B (YYY)              | 0.176      | 0.074            | 0.326            |              |           |            |
| <b>constrain N</b>      |            |                  |                  | -240.788     | 6         | 493.576    |
| S->(G)                  | 0.800      | 0.560            | 0.946            |              |           |            |
| S->(H)                  | 0.200      | 0.054            | 0.440            |              |           |            |
| G->A                    | 0.372      | 0.296            | 0.451            |              |           |            |
| G->A (X)                | 0.155      | 0.103            | 0.219            |              |           |            |
| G->A (XX)               | 0.182      | 0.126            | 0.250            |              |           |            |
| G->A (XXX)              | 0.291      | 0.221            | 0.367            |              |           |            |
| X->G                    | 0.958      | 0.921            | 0.982            |              |           |            |
| X->H                    | 0.042      | 0.018            | 0.079            |              |           |            |
| Y->G                    | 0.053      | 0.009            | 0.154            |              |           |            |
| Y->H                    | 0.947      | 0.846            | 0.991            |              |           |            |
| <b>constrain both</b>   |            |                  |                  | -309.384     | 5         | 628.768    |
| S->(G)                  | 0.800      | 0.560            | 0.946            |              |           |            |
| S->(H)                  | 0.200      | 0.054            | 0.440            |              |           |            |
| G->A                    | 0.372      | 0.296            | 0.451            |              |           |            |
| G->A (X)                | 0.155      | 0.103            | 0.219            |              |           |            |
| G->A (XX)               | 0.182      | 0.126            | 0.250            |              |           |            |
| G->A (XXX)              | 0.291      | 0.221            | 0.367            |              |           |            |
| X->G                    | 0.791      | 0.732            | 0.843            |              |           |            |
| X->H                    | 0.209      | 0.157            | 0.268            |              |           |            |
| <b>dependent mixing</b> |            |                  |                  | -238.662     | 7         | 491.324    |
| S->(G)                  | 0.800      | 0.560            | 0.946            |              |           |            |
| S->(H)                  | 0.200      | 0.054            | 0.440            |              |           |            |
| G->A                    | 0.372      | 0.296            | 0.451            |              |           |            |
| G->A (X)                | 0.155      | 0.103            | 0.219            |              |           |            |
| G->A (XX)               | 0.182      | 0.126            | 0.250            |              |           |            |
| G->A (XXX)              | 0.291      | 0.221            | 0.367            |              |           |            |
| X->G                    | 0.996      | 0.991            | 0.998            |              |           |            |
| X->H                    | 0.004      | 0.002            | 0.009            |              |           |            |
| XX->GX                  | 0.984      | 0.984            | 0.984            |              |           |            |
| XX->HX                  | 0.016      | 0.011            | 0.023            |              |           |            |
| XXX->GXX                | 0.943      | 0.940            | 0.945            |              |           |            |
| XXX->HXX                | 0.057      | 0.026            | 0.103            |              |           |            |
| Y->G                    | 0.167      | 0.031            | 0.411            |              |           |            |
| Y->H                    | 0.833      | 0.589            | 0.969            |              |           |            |
| YY->GY                  | 0.052      | 0.038            | 0.075            |              |           |            |
| YY->HY                  | 0.948      | 0.947            | 0.949            |              |           |            |
| YYY->GY                 | 0.015      | 0.010            | 0.022            |              |           |            |
| YYY->HY                 | 0.985      | 0.985            | 0.985            |              |           |            |
| Gfactor                 |            |                  |                  |              |           |            |
| <b>latent mixing</b>    |            |                  |                  | -309.144     | 10        | 638.288    |
| S->(G)                  | 0.000      | 0.000            | 0.713            |              |           |            |
| S->(H)                  | 0.200      | 0.054            | 0.440            |              |           |            |
| S->(g)                  | 0.800      | 0.560            | 0.946            |              |           |            |
| S->(h)                  | 0.000      | 0.000            | 0.272            |              |           |            |
| G->A                    | 0.372      | 0.296            | 0.451            |              |           |            |
| G->A (X)                | 0.155      | 0.103            | 0.219            |              |           |            |
| G->A (XX)               | 0.182      | 0.126            | 0.250            |              |           |            |
| G->A (XXX)              | 0.291      | 0.221            | 0.367            |              |           |            |
| X->G                    | 0.000      | 0.000            | 0.473            |              |           |            |
| X->H                    | 0.000      | 0.000            | 0.324            |              |           |            |
| X->g                    | 0.775      | 0.241            | 0.787            |              |           |            |
| X->h                    | 0.225      | 0.022            | 0.271            |              |           |            |
| x->G                    | 0.081      | 0.000            | 0.229            |              |           |            |
| x->H                    | 0.000      | 0.000            | 0.127            |              |           |            |
| x->g                    | 0.712      | 0.642            | 0.742            |              |           |            |
| x->h                    | 0.207      | 0.135            | 0.267            |              |           |            |
| <b>add hidden</b>       |            |                  |                  | -234.651     | 13        | 495.302    |
| S->(g)                  | 0.800      | 0.560            | 0.946            |              |           |            |
| S->(h)                  | 0.200      | 0.054            | 0.440            |              |           |            |
| G->A                    | 0.368      | 0.288            | 0.453            |              |           |            |
| G->A (X)                | 0.176      | 0.117            | 0.247            |              |           |            |
| G->A (XX)               | 0.197      | 0.135            | 0.271            |              |           |            |
| G->A (XXX)              | 0.259      | 0.189            | 0.339            |              |           |            |
| X->G                    | 0.966      | 0.965            | 0.967            |              |           |            |
| X->H                    | 0.034      | 0.266            | 0.678            |              |           |            |
| Y->G                    | 0.078      | 0.014            | 0.196            |              |           |            |
| Y->H                    | 0.922      | 0.909            | 0.927            |              |           |            |
| g->A                    | 0.401      | 0.187            | 0.644            |              |           |            |
| g->A (x)                | 0.000      | 0.000            | 0.111            |              |           |            |
| g->A (xx)               | 0.067      | 0.004            | 0.263            |              |           |            |
| g->A (xxx)              | 0.531      | 0.295            | 0.760            |              |           |            |
| x->G                    | 0.900      | 0.863            | 0.878            |              |           |            |
| x->H                    | 0.100      | 0.012            | 0.236            |              |           |            |
| x->g                    | 0.000      | 0.000            | 0.261            |              |           |            |
| x->h                    | 0.000      | 0.000            | 0.006            |              |           |            |
| y->G                    | 0.000      | 0.000            | 0.063            |              |           |            |
| y->H                    | 0.791      | 0.556            | 0.827            |              |           |            |
| y->g                    | 0.000      | 0.000            | 0.120            |              |           |            |
| y->h                    | 0.209      | 0.017            | 0.386            |              |           |            |
| <b>SYPHILIS</b>         | <b>MLE</b> | <b>Lower 95%</b> | <b>Upper 95%</b> | <b>log L</b> | <b>df</b> | <b>AIC</b> |
| <b>2-visible</b>        |            |                  |                  | -282.068     | 9         | 582.136    |
| S->(G)                  | 0.200      | 0.054            | 0.440            |              |           |            |
| S->(H)                  | 0.800      | 0.560            | 0.946            |              |           |            |
| G->A                    | 0.435      | 0.247            | 0.636            |              |           |            |
| G->A (X)                | 0.087      | 0.015            | 0.245            |              |           |            |
| G->A (XX)               | 0.261      | 0.113            | 0.459            |              |           |            |
| G->A (XXX)              | 0.217      | 0.084            | 0.410            |              |           |            |
| X->G                    | 0.276      | 0.137            | 0.453            |              |           |            |
| X->H                    | 0.724      | 0.547            | 0.863            |              |           |            |
| H->B                    | 0.360      | 0.279            | 0.446            |              |           |            |
| H->B (Y)                | 0.168      | 0.110            | 0.240            |              |           |            |
| H->B (YY)               | 0.168      | 0.110            | 0.240            |              |           |            |
| H->B (YYY)              | 0.304      | 0.228            | 0.388            |              |           |            |
| Y->G                    | 0.113      | 0.072            | 0.165            |              |           |            |
| Y->H                    | 0.887      | 0.835            | 0.928            |              |           |            |
| <b>constrain mix</b>    |            |                  |                  | -284.437     | 8.000     | 584.874    |
| S->(G)                  | 0.200      | 0.054            | 0.440            |              |           |            |
| S->(H)                  | 0.800      | 0.560            | 0.946            |              |           |            |
| G->A                    | 0.435      | 0.247            | 0.636            |              |           |            |
| G->A (X)                | 0.087      | 0.015            | 0.245            |              |           |            |
| G->A (XX)               | 0.261      | 0.113            | 0.459            |              |           |            |
| G->A (XXX)              | 0.217      | 0.084            | 0.410            |              |           |            |
| X->G                    | 0.136      | 0.094            | 0.187            |              |           |            |
| X->H                    | 0.864      | 0.813            | 0.906            |              |           |            |
| H->B                    | 0.360      | 0.279            | 0.446            |              |           |            |
| H->B (Y)                | 0.168      | 0.110            | 0.240            |              |           |            |
| H->B (YY)               | 0.168      | 0.110            | 0.240            |              |           |            |
| H->B (YYY)              | 0.304      | 0.228            | 0.388            |              |           |            |
| Y->G                    | 0.113      | 0.072            | 0.165            |              |           |            |
| Y->H                    | 0.887      | 0.835            | 0.928            |              |           |            |
| <b>constrain N</b>      |            |                  |                  | -283.369     | 6.000     | 578.738    |
| S->(G)                  | 0.200      | 0.054            | 0.440            |              |           |            |
| S->(H)                  | 0.800      | 0.560            | 0.946            |              |           |            |
| G->A                    | 0.372      | 0.296            | 0.451            |              |           |            |
| G->A (X)                | 0.155      | 0.103            | 0.219            |              |           |            |
| G->A (XX)               | 0.182      | 0.126            | 0.250            |              |           |            |
| G->A (XXX)              | 0.291      | 0.221            | 0.367            |              |           |            |
| X->G                    | 0.276      | 0.137            | 0.453            |              |           |            |
| X->H                    | 0.724      | 0.547            | 0.863            |              |           |            |
| H->B                    |            |                  |                  |              |           |            |
| H->B (Y)                |            |                  |                  |              |           |            |
| H->B (YY)               |            |                  |                  |              |           |            |
| H->B (YYY)              |            |                  |                  |              |           |            |
| Y->G                    | 0.113      | 0.072            | 0.165            |              |           |            |
| Y->H                    | 0.887      | 0.835            | 0.928            |              |           |            |
| <b>constrain both</b>   |            |                  |                  | -285.738     | 5         | 581.476    |
| S->(G)                  | 0.200      | 0.054            | 0.440            |              |           |            |
| S->(H)                  | 0.800      | 0.560            | 0.946            |              |           |            |
| G->A                    | 0.372      | 0.296            | 0.451            |              |           |            |
| G->A (X)                | 0.155      | 0.103            | 0.219            |              |           |            |
| G->A (XX)               | 0.182      | 0.126            | 0.250            |              |           |            |
| G->A (XXX)              | 0.291      | 0.221            | 0.367            |              |           |            |
| X->G                    | 0.136      | 0.094            | 0.187            |              |           |            |
| X->H                    | 0.864      | 0.813            | 0.906            |              |           |            |
| <b>latent mixing</b>    |            |                  |                  | -281.019     | 10        | 582.038    |
| S->(G)                  | 0.200      | 0.054            | 0.440            |              |           |            |
| S->(H)                  | 0.000      | 0.000            | 0.439            |              |           |            |
| S->(g)                  | 0.800      | 0.560            | 0.946            |              |           |            |
| S->(h)                  | 0.000      | 0.000            | 0.188            |              |           |            |
| G->A                    | 0.372      | 0.296            | 0.451            |              |           |            |
| G->A (X)                | 0.155      | 0.103            | 0.219            |              |           |            |
| G->A (XX)               | 0.182      | 0.126            | 0.250            |              |           |            |
| G->A (XXX)              | 0.291      | 0.221            | 0.367            |              |           |            |
| X->G                    | 0.279      | 0.152            | 0.411            |              |           |            |
| X->H                    | 0.476      | 0.319            | 0.571            |              |           |            |
| X->g                    | 0.003      | 0.000            | 0.033            |              |           |            |
| X->h                    | 0.243      | 0.098            | 0.373            |              |           |            |
| x->G                    | 0.048      | 0.012            | 0.128            |              |           |            |
| x->H                    | 0.081      | 0.024            | 0.174            |              |           |            |
| x->g                    | 0.009      | 0.000            | 0.068            |              |           |            |
| x->h                    | 0.862      | 0.834            | 0.873            |              |           |            |
| <b>add hidden</b>       |            |                  |                  | -275.94      | 13        | 577.88     |
| S->(g)                  | 0.200      | 0.054            | 0.440            |              |           |            |
| S->(h)                  | 0.800      | 0.560            | 0.946            |              |           |            |
| G->A                    | 0.375      | 0.292            | 0.464            |              |           |            |
| G->A (X)                | 0.186      | 0.124            | 0.261            |              |           |            |
| G->A (XX)               | 0.204      | 0.139            | 0.281            |              |           |            |
| G->A (XXX)              | 0.235      | 0.163            | 0.318            |              |           |            |

| HOME-USE              | MLE        | Lower 95%        | Upper 95%        | log L        | df        | AIC        |
|-----------------------|------------|------------------|------------------|--------------|-----------|------------|
| <b>2-visible</b>      |            |                  |                  | -333.597     | 9         | 685.194    |
| S->(G)                | 0.267      | 0.092            | 0.515            |              |           |            |
| S->(H)                | 0.733      | 0.485            | 0.908            |              |           |            |
| G->A                  | 0.455      | 0.313            | 0.601            |              |           |            |
| G->A(X)               | 0.182      | 0.088            | 0.312            |              |           |            |
| G->A(XX)              | 0.136      | 0.057            | 0.257            |              |           |            |
| G->A(XXX)             | 0.227      | 0.121            | 0.364            |              |           |            |
| X->G                  | 0.520      | 0.383            | 0.655            |              |           |            |
| X->H                  | 0.480      | 0.345            | 0.617            |              |           |            |
| H->B                  | 0.337      | 0.250            | 0.431            |              |           |            |
| H->B(Y)               | 0.144      | 0.086            | 0.220            |              |           |            |
| H->B(YY)              | 0.202      | 0.133            | 0.286            |              |           |            |
| H->B(YYY)             | 0.317      | 0.233            | 0.410            |              |           |            |
| Y->G                  | 0.301      | 0.233            | 0.376            |              |           |            |
| Y->H                  | 0.699      | 0.624            | 0.767            |              |           |            |
| <b>constrain mix</b>  |            |                  |                  | -337.438     | 8         | 690.876    |
| S->(G)                | 0.267      | 0.092            | 0.515            |              |           |            |
| S->(H)                | 0.733      | 0.485            | 0.908            |              |           |            |
| G->A                  | 0.455      | 0.313            | 0.601            |              |           |            |
| G->A(X)               | 0.182      | 0.088            | 0.312            |              |           |            |
| G->A(XX)              | 0.136      | 0.057            | 0.257            |              |           |            |
| G->A(XXX)             | 0.227      | 0.121            | 0.364            |              |           |            |
| X->G                  | 0.354      | 0.291            | 0.421            |              |           |            |
| X->H                  | 0.646      | 0.579            | 0.709            |              |           |            |
| H->B                  | 0.337      | 0.250            | 0.431            |              |           |            |
| H->B(Y)               | 0.144      | 0.086            | 0.220            |              |           |            |
| H->B(YY)              | 0.202      | 0.133            | 0.286            |              |           |            |
| H->B(YYY)             | 0.317      | 0.233            | 0.410            |              |           |            |
| <b>constrain N</b>    |            |                  |                  | -335.128     | 6         | 682.256    |
| S->(G)                | 0.267      | 0.092            | 0.515            |              |           |            |
| S->(H)                | 0.733      | 0.485            | 0.908            |              |           |            |
| G->A                  | 0.372      | 0.296            | 0.451            |              |           |            |
| G->A(X)               | 0.155      | 0.103            | 0.219            |              |           |            |
| G->A(XX)              | 0.182      | 0.126            | 0.250            |              |           |            |
| G->A(XXX)             | 0.291      | 0.221            | 0.367            |              |           |            |
| X->G                  | 0.520      | 0.383            | 0.655            |              |           |            |
| X->H                  | 0.480      | 0.345            | 0.617            |              |           |            |
| Y->G                  | 0.301      | 0.233            | 0.376            |              |           |            |
| Y->H                  | 0.699      | 0.624            | 0.767            |              |           |            |
| <b>constrain both</b> |            |                  |                  | -338.97      | 5         | 687.94     |
| S->(G)                | 0.267      | 0.092            | 0.515            |              |           |            |
| S->(H)                | 0.733      | 0.485            | 0.908            |              |           |            |
| G->A                  | 0.372      | 0.296            | 0.451            |              |           |            |
| G->A(X)               | 0.155      | 0.103            | 0.219            |              |           |            |
| G->A(XX)              | 0.182      | 0.126            | 0.250            |              |           |            |
| G->A(XXX)             | 0.291      | 0.221            | 0.367            |              |           |            |
| X->G                  | 0.354      | 0.291            | 0.421            |              |           |            |
| X->H                  | 0.646      | 0.579            | 0.709            |              |           |            |
| <b>latent mixing</b>  |            |                  |                  | -331.919     | 10        | 683.838    |
| S->(G)                | 0.267      | 0.092            | 0.515            |              |           |            |
| S->(H)                | 0.000      | 0.000            | 0.284            |              |           |            |
| S->(g)                | 0.000      | 0.000            | 0.207            |              |           |            |
| S->(h)                | 0.733      | 0.485            | 0.908            |              |           |            |
| G->A                  | 0.372      | 0.296            | 0.451            |              |           |            |
| G->A(X)               | 0.155      | 0.193            | 0.327            |              |           |            |
| G->A(XX)              | 0.182      | 0.126            | 0.250            |              |           |            |
| G->A(XXX)             | 0.291      | 0.221            | 0.367            |              |           |            |
| X->G                  | 0.532      | 0.421            | 0.610            |              |           |            |
| X->H                  | 0.375      | 0.242            | 0.465            |              |           |            |
| X->g                  | 0.007      | 0.000            | 0.046            |              |           |            |
| X->h                  | 0.086      | 0.005            | 0.213            |              |           |            |
| x->G                  | 0.144      | 0.068            | 0.246            |              |           |            |
| x->H                  | 0.102      | 0.039            | 0.188            |              |           |            |
| x->g                  | 0.055      | 0.000            | 0.149            |              |           |            |
| x->h                  | 0.699      | 0.625            | 0.741            |              |           |            |
| <b>add hidden</b>     |            |                  |                  | -327.539     | 13        | 681.078    |
| S->(g)                | 0.267      | 0.092            | 0.515            |              |           |            |
| S->(h)                | 0.733      | 0.485            | 0.908            |              |           |            |
| G->A                  | 0.368      | 0.290            | 0.452            |              |           |            |
| G->A(X)               | 0.173      | 0.115            | 0.243            |              |           |            |
| G->A(XX)              | 0.196      | 0.134            | 0.268            |              |           |            |
| G->A(XXX)             | 0.263      | 0.193            | 0.342            |              |           |            |
| p3                    |            |                  |                  |              |           |            |
| p4                    |            |                  |                  |              |           |            |
| p5                    |            |                  |                  |              |           |            |
| p6                    |            |                  |                  |              |           |            |
| X->G                  | 0.500      | 0.415            | 0.563            |              |           |            |
| X->H                  | 0.500      | 0.416            | 0.563            |              |           |            |
| Y->G                  | 0.331      | 0.276            | 0.381            |              |           |            |
| Y->H                  | 0.669      | 0.640            | 0.692            |              |           |            |
| g->A                  | 0.400      | 0.183            | 0.649            |              |           |            |
| g->A(x)               | 0.000      | 0.000            | 0.120            |              |           |            |
| g->A(xx)              | 0.067      | 0.000            | 0.262            |              |           |            |
| g->A(xxx)             | 0.533      | 0.291            | 0.765            |              |           |            |
| x->G                  | 0.667      | 0.445            | 0.457            |              |           |            |
| x->H                  | 0.333      | 0.027            | 0.519            |              |           |            |
| x->g                  | 0.000      | 0.000            | 0.400            |              |           |            |
| x->h                  | 0.000      | 0.000            | 0.044            |              |           |            |
| y->G                  | 0.100      | 0.019            | 0.163            |              |           |            |
| y->H                  | 0.900      | 0.819            | 0.908            |              |           |            |
| y->g                  | 0.000      | 0.000            | 0.094            |              |           |            |
| y->h                  | 0.000      | 0.401            | 0.420            |              |           |            |
| <b>METH</b>           | <b>MLE</b> | <b>Lower 95%</b> | <b>Upper 95%</b> | <b>log L</b> | <b>df</b> | <b>AIC</b> |
| <b>2-visible</b>      |            |                  |                  | -305.188     | 9         | 628.376    |
| S->(G)                | 0.867      | 0.642            | 0.977            |              |           |            |
| S->(H)                | 0.133      | 0.023            | 0.358            |              |           |            |
| G->A                  | 0.364      | 0.281            | 0.452            |              |           |            |
| G->A(X)               | 0.157      | 0.100            | 0.229            |              |           |            |
| G->A(XX)              | 0.174      | 0.113            | 0.248            |              |           |            |
| G->A(XXX)             | 0.306      | 0.264            | 0.391            |              |           |            |
| X->G                  | 0.767      | 0.701            | 0.826            |              |           |            |
| X->H                  | 0.233      | 0.174            | 0.299            |              |           |            |
| H->B                  | 0.407      | 0.237            | 0.595            |              |           |            |
| H->B(Y)               | 0.148      | 0.049            | 0.311            |              |           |            |
| H->B(YY)              | 0.222      | 0.095            | 0.400            |              |           |            |
| H->B(YYY)             | 0.222      | 0.095            | 0.400            |              |           |            |
| Y->G                  | 0.912      | 0.787            | 0.977            |              |           |            |
| Y->H                  | 0.088      | 0.023            | 0.213            |              |           |            |
| <b>constrain mix</b>  |            |                  |                  | -307.287     | 8         | 630.574    |
| S->(G)                | 0.867      | 0.642            | 0.977            |              |           |            |
| S->(H)                | 0.133      | 0.023            | 0.358            |              |           |            |
| G->A                  | 0.364      | 0.281            | 0.452            |              |           |            |
| G->A(X)               | 0.157      | 0.100            | 0.229            |              |           |            |
| G->A(XX)              | 0.174      | 0.113            | 0.248            |              |           |            |
| G->A(XXX)             | 0.306      | 0.228            | 0.391            |              |           |            |
| X->G                  | 0.791      | 0.732            | 0.843            |              |           |            |
| X->H                  | 0.209      | 0.157            | 0.268            |              |           |            |
| H->B                  | 0.407      | 0.237            | 0.595            |              |           |            |
| H->B(Y)               | 0.148      | 0.049            | 0.311            |              |           |            |
| H->B(YY)              | 0.222      | 0.095            | 0.400            |              |           |            |
| H->B(YYY)             | 0.222      | 0.095            | 0.062            |              |           |            |
| <b>constrain N</b>    |            |                  |                  | -305.669     | 6         | 623.338    |
| S->(G)                | 0.867      | 0.642            | 0.977            |              |           |            |
| S->(H)                | 0.133      | 0.023            | 0.358            |              |           |            |
| G->A                  | 0.372      | 0.296            | 0.451            |              |           |            |
| G->A(X)               | 0.155      | 0.103            | 0.219            |              |           |            |
| G->A(XX)              | 0.182      | 0.126            | 0.250            |              |           |            |
| G->A(XXX)             | 0.291      | 0.221            | 0.367            |              |           |            |
| X->G                  | 0.767      | 0.701            | 0.826            |              |           |            |
| X->H                  | 0.233      | 0.174            | 0.299            |              |           |            |
| Y->G                  | 0.912      | 0.787            | 0.977            |              |           |            |
| Y->H                  | 0.088      | 0.189            | 0.213            |              |           |            |
| <b>constrain both</b> |            |                  |                  | -307.768     | 5         | 625.536    |
| S->(G)                | 0.867      | 0.642            | 0.977            |              |           |            |
| S->(H)                | 0.133      | 0.023            | 0.358            |              |           |            |
| G->A                  | 0.372      | 0.296            | 0.451            |              |           |            |
| G->A(X)               | 0.155      | 0.103            | 0.219            |              |           |            |
| G->A(XX)              | 0.182      | 0.126            | 0.250            |              |           |            |
| G->A(XXX)             | 0.291      | 0.221            | 0.367            |              |           |            |
| X->G                  | 0.791      | 0.732            | 0.843            |              |           |            |
| X->H                  | 0.209      | 0.157            | 0.268            |              |           |            |
| <b>latent mixing</b>  |            |                  |                  | -300.509     | 10        | 621.018    |
| S->(G)                | 0.000      | 0.000            | 0.370            |              |           |            |
| S->(H)                | 0.107      | 0.005            | 0.337            |              |           |            |
| S->(g)                | 0.867      | 0.642            | 0.977            |              |           |            |
| S->(h)                | 0.026      | 0.000            | 0.248            |              |           |            |
| G->A                  | 0.372      | 0.296            | 0.451            |              |           |            |
| G->A(X)               | 0.155      | 0.193            | 0.327            |              |           |            |
| G->A(XX)              | 0.182      | 0.126            | 0.250            |              |           |            |
| G->A(XXX)             | 0.291      | 0.221            | 0.367            |              |           |            |
| X->G                  | 0.000      | 0.000            | 0.158            |              |           |            |
| X->H                  | 0.762      | 0.691            | 0.777            |              |           |            |
| X->g                  | 0.231      | 0.000            | 0.289            |              |           |            |
| X->h                  | 0.007      | 0.000            | 0.239            |              |           |            |
| x->G                  | 0.000      | 0.000            | 0.184            |              |           |            |
| x->H                  | 1.000      | 1.000            | 1.000            |              |           |            |
| x->g                  | 0.000      | 0.000            | 0.073            |              |           |            |
| x->h                  | 0.000      | 0.000            | 0.073            |              |           |            |
| <b>add hidden</b>     |            |                  |                  | -294.872     | 13        | 615.744    |
| S->(g)                | 0.867      | 0.642            | 0.977            |              |           |            |
| S->(h)                | 0.133      | 0.023            | 0.358            |              |           |            |
| G->A                  | 0.368      | 0.288            | 0.453            |              |           |            |
| G->A(X)               | 0.175      | 0.117            | 0.247            |              |           |            |
| G->A(XX)              | 0.197      | 0.135            | 0.271            |              |           |            |
| G->A(XXX)             | 0.259      | 0.189            | 0.339            |              |           |            |
| p3                    |            |                  |                  |              |           |            |
| p4                    |            |                  |                  |              |           |            |
| p5                    |            |                  |                  |              |           |            |
| p6                    |            |                  |                  |              |           |            |
| X->G                  | 0.731      | 0.709            | 0.748            |              |           |            |
| X->H                  | 0.269      | 0.216            | 0.321            |              |           |            |
| Y->G                  | 0.929      | 0.918            | 0.933            |              |           |            |
| Y->H                  | 0.071      | 0.013            | 0.181            |              |           |            |
| g->A                  | 0.400      | 0.184            | 0.645            |              |           |            |
| g->A(x)               | 0.000      | 0.000            | 0.118            |              |           |            |
| g->A(xx)              | 0.068      | 0.004            | 0.262            |              |           |            |
| g->A(xxx)             | 0.533      | 0.294            | 0.763            |              |           |            |
| x->G                  | 0.955      | 0.934            | 0.957            |              |           |            |
| x->H                  | 0.000      | 0.000            | 0.082            |              |           |            |
| x->g                  | 0.045      | 0.000            | 0.238            |              |           |            |
| x->h                  | 0.000      | 0.000            | 0.000            |              |           |            |
| y->G                  | 0.713      | 0.432            | 0.608            |              |           |            |
| y->H                  | 0.143      | 0.003            | 0.392            |              |           |            |
| y->g                  | 0.121      | 0.000            | 0.467            |              |           |            |
| y->h                  | 0.024      | 0.134            | 0.355            |              |           |            |
